# Supplementary material for: α-Conotoxin Decontamination Protocol Evaluation: What Works and What Doesn’t
Source: MDPI journal article supplement (doi:10.3390/toxins9090281), 2017-09-14
Supplement: s1 [file s1]

# Supplementary Materials: $\alpha$ -Conotoxin Decontamination Protocol Evaluation: What Works and What Doesn't

Matthew W. Turner, John R. Cort and Owen M. McDougal

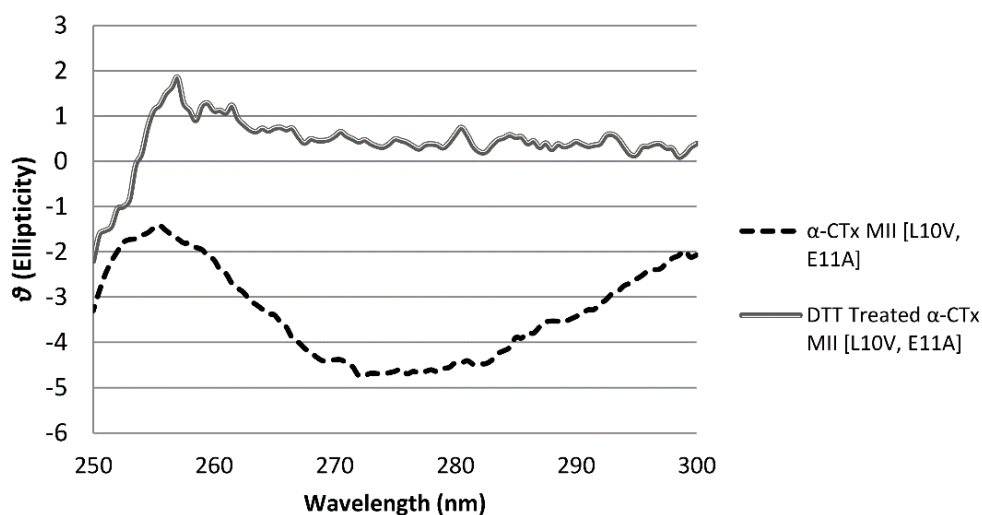

**Figure S1.** Near UV data of untreated and dithiothreitol treated  $\alpha$ -CTx MII (L10V, E11A) is shown. The loss of the broad band at 275 nm corresponds to the reduction of disulfide bonds.

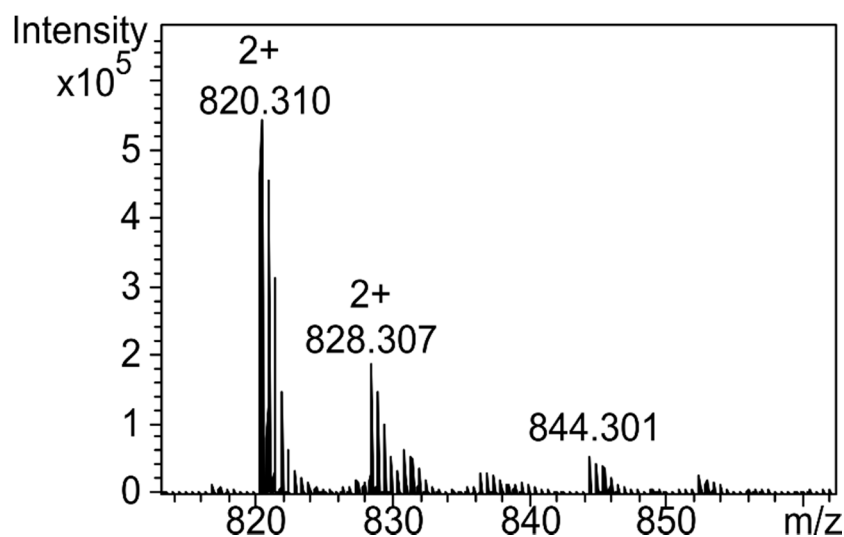

**Figure S2.**  $\alpha$ -CTx MII (L10V, E11A) exposed to ozone for 24 hrs. Approximately 30% of  $\alpha$ -CTx MII (L10V, E11A) has a mass shift of 16 Da following ozone treatment, as observed as 8 Da shift from 820.310 to 828.307 in the doubly charged ion. This did not result in a change in secondary structure.

**Table S1.** Concentration of chemicals when analyzed by far-UV CD spectroscopy. The concentration of  $\alpha$ -CTx MII (L10V, E11A) was 50  $\mu$ M in each trial.

| Treatment                        | Concentration |
|----------------------------------|---------------|
| 6% Sodium hypochlorite           | 0.3%          |
| 1% Contrex™ EZ                   | 0.05%         |
| 8 M Urea                         | 80 mM         |
| 6 M HCl                          | 60 mM         |
| 2% Gluteraldehyde                | 0.5%          |
| 1%Gluteraldehyde/1% formaldehyde | 0.5%/0.5%     |
| 10 mM DTT                        | 500 $\mu$ M   |
| 500 $\mu$ M Glutathione          | 500 $\mu$ M   |
| 10% Hydrogen peroxide            | 0.03%         |
